# Supplementary material for: Enhanced thread spray mass spectrometry: a general method for direct pesticide analysis in various complex matrices
Source: Royal Society of Chemistry journal article supplement (doi:10.1039/d1an00651g), 2021-01-01
Supplement: d1an00651g1.pdf [file d1an00651g1.pdf]

## Supporting Information

# Enhanced thread Spray Mass Spectrometry: A General Method for Direct Pesticide Analysis in Various Complex Matrices

Sierra Jackson and *Abraham K. Badu-Tawiah\**

Department of Chemistry and Biochemistry, The Ohio State University, Columbus, OH 43210

\*Correspondence to Dr. Abraham Badu-Tawiah

100 W. 18<sup>th</sup> Avenue, Columbus OH, 43210 Email:

[badu-tawiah.1@osu.edu](mailto:badu-tawiah.1@osu.edu)

Tel.: 614-292-4276

Fax: (614) 292-1685

Supporting information is summarized in the table below

| Topic                          | Title of Topic                                                   | Pages |
|--------------------------------|------------------------------------------------------------------|-------|
| <b>Topic 1</b><br>(Figure S-1) | Thread Spray Apparatus Images                                    | S-3   |
| <b>Topic 2</b><br>(Figure S-2) | Atrazine (ATZ) Tandem Mass Spectrum                              | S-4   |
| <b>Topic 3</b><br>(Figure S3)  | Glyphosate (GLYP) and Aminomethyl-phosphonic Acid (AMPA) Spectra | S-5   |
| <b>Topic 4</b><br>(Figure S-4) | Detection of Diphenylamine from Apples via Thread Spray MS       | S-6   |
| <b>Topic 5</b><br>(Figure S-5) | Detection of Thiabendazole from Oranges via Thread Spray MS      | S-7   |

**1. Thread Spray Apparatus Images:** Microscopic images of the traditional thread spray apparatus and enhanced thread spray apparatus.

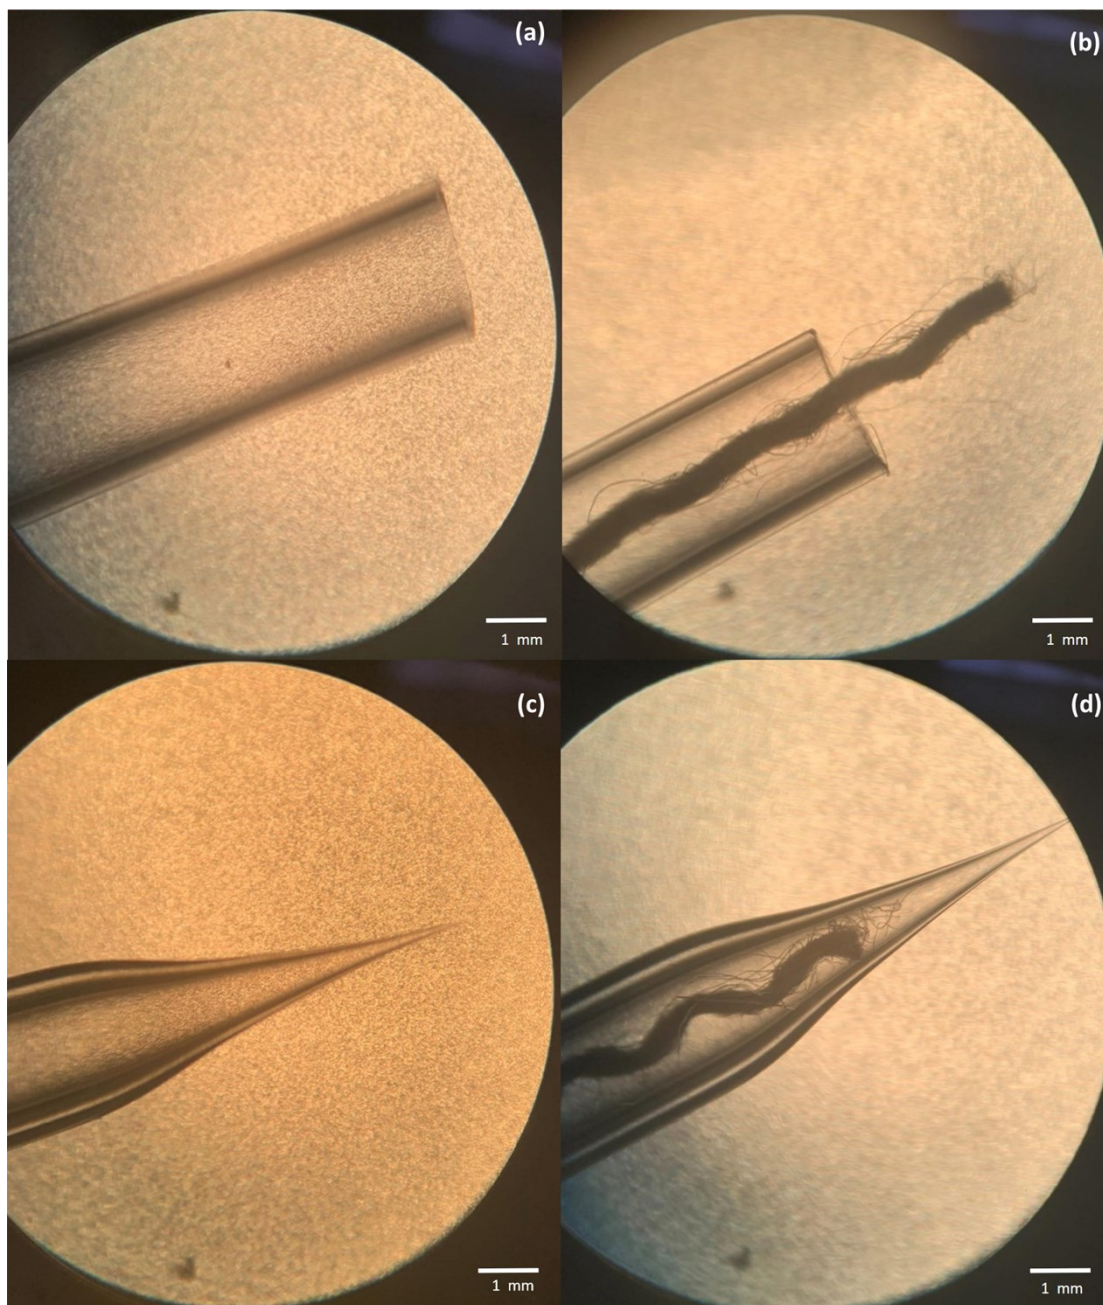

**Figure S1.** Microscope images of (a) conventional thread spray emitter, (b) conventional thread spray emitter with thread inserted, (c) enhanced thread spray emitter, and (d) enhanced thread spray emitter with thread inserted.

**2. Atrazine (ATZ) Tandem Mass Spectrum:** Tandem mass spectrometry (MS<sup>3</sup>) analysis of atrazine performed via enhanced thread spray MS.

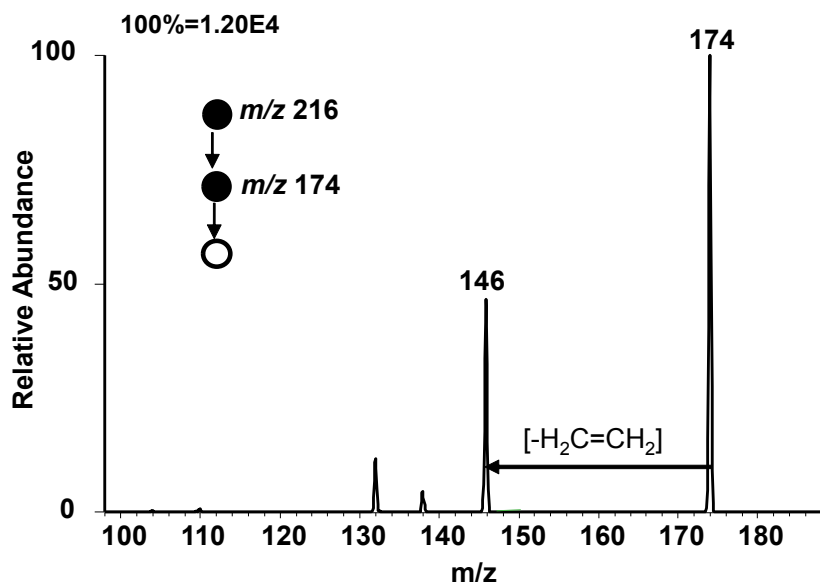

**Figure S2.** Tandem mass (MS<sup>3</sup>) spectrum for atrazine (ATZ) via enhanced thread spray. Spray voltage was 4 kV for enhanced thread spray experiments.

**3. Glyphosate (GLYP) and Aminomethyl-phosphonic Acid (AMPA) Spectra:** Comparative analysis of GLYP performed via traditional thread spray and the enhanced thread spray. Followed by AMPA analysis via enhanced thread spray MS.

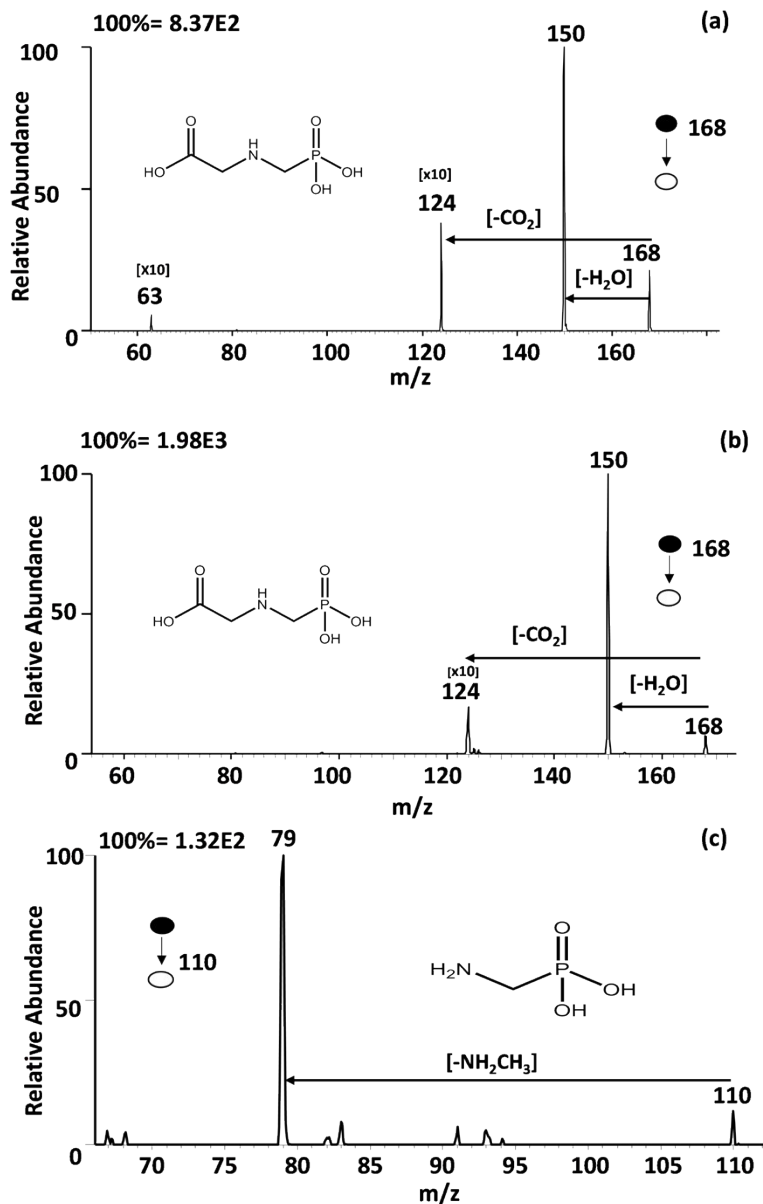

**Figure S3.** Tandem mass spectra for glyphosate using (a) traditional thread spray and (b) enhanced thread spray. Tandem mass spectrum of (c) aminomethyl-phosphonic acid, via enhanced thread spray. Spray voltage was 4 kV for both of the enhanced thread spray experiments.

**4. Detection of Diphenylamine from Apples via Thread Spray MS:** Diphenylamine, DPA, was first identified using enhanced thread spray MS. The detection of DPA on (store purchased organic and non-organic) apples was achieved by wetting thread with a MeOH:H<sub>2</sub>O solution then wiping the fruit's surface with the thread for enhanced thread spray MS. In order to achieve targeted DPA identification within the

apple, a thread suspended on a needle was used to probe the core of the apple. Thread was pushed into the fruit, DPA residues were collected on threads followed by enhanced thread spray MS.

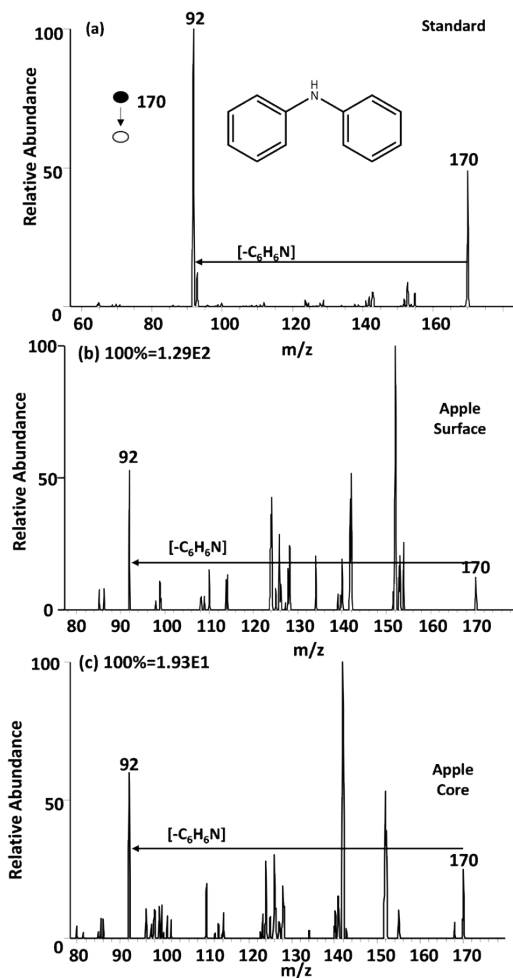

**Figure S4.** MS<sup>2</sup> spectrum of diphenylamine, m/z 170 showing fragment at m/z 92 using enhanced thread spray of (a) 1 µg/mL of DPA in MeOH (b) apple peel and (c) apple core with enhanced thread spray using the wiping method. Spray voltage was 4 kV.

## 5. Detection of Thiabendazole from Oranges via Enhanced thread Spray MS:

Thiabendazole, TBZ, was first identified using enhanced thread spray MS. The detection of TBZ on (store purchased organic and non-organic) oranges was achieved by wetting thread with a MeOH:H<sub>2</sub>O solution then wiping the fruit's surface with the thread for enhanced thread spray MS. In order to achieve targeted TBZ identification within the oranges, a thread suspended on a needle was used to probe the pulp of

the orange. Thread was pushed into the fruit, TBZ residues were collected on threads followed by enhanced thread spray MS.

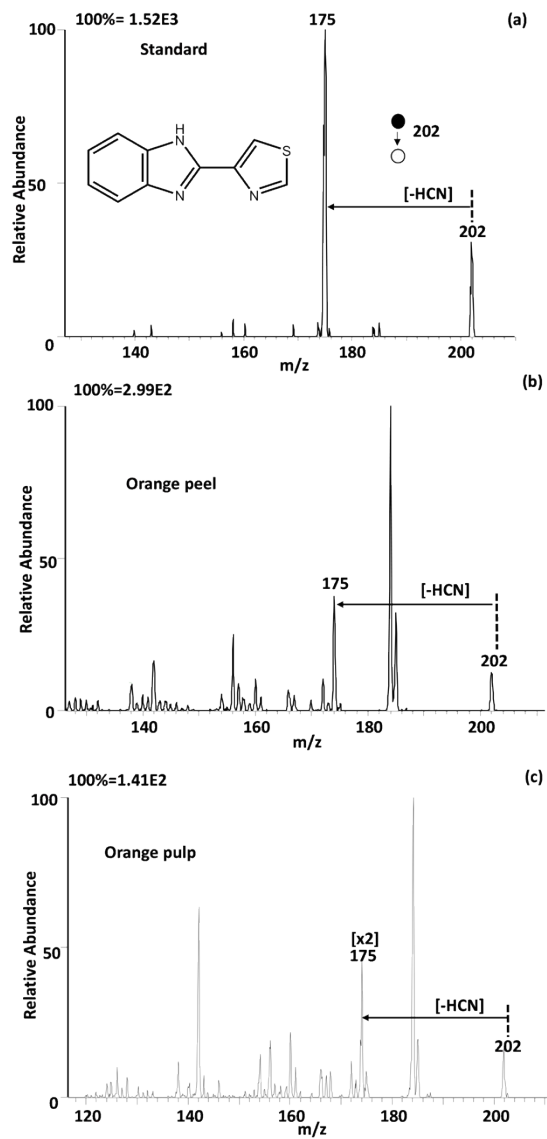

**Figure S5.** Tandem mass spectra in positive ion mode of thiabendazole, TBZ, obtained from (a) 50 µg/mL of TBZ in MeOH:H<sub>2</sub>O (9:1, v/v) (b) orange peel and (c) pulp. Spray voltage was 4 kV.
